# Supplementary material for: Transmitted Virus Fitness and Host T Cell Responses Collectively Define Divergent Infection Outcomes in Two HIV-1 Recipients
Source: PubMed Central journal article supplement (PMC4287535; doi:10.1371/journal.ppat.1004565), 2015-01-08

**A.**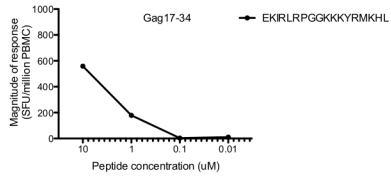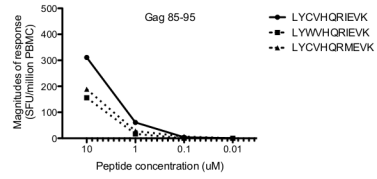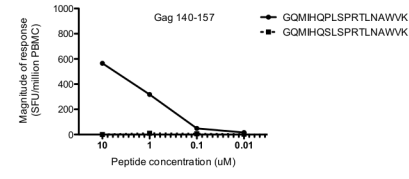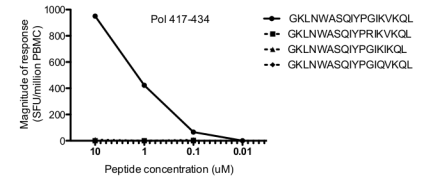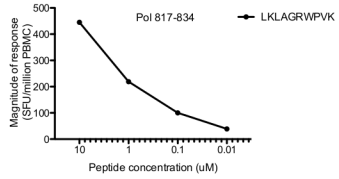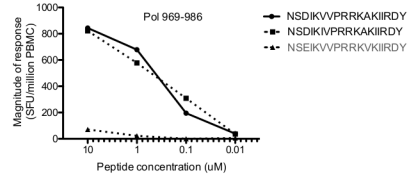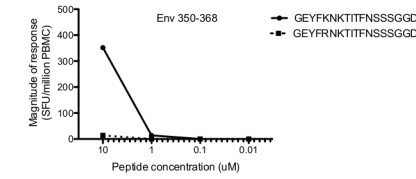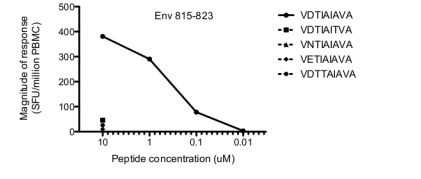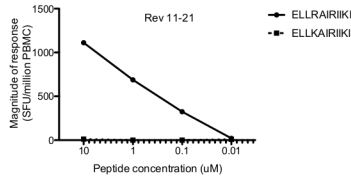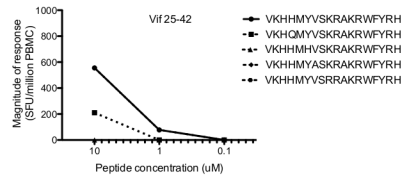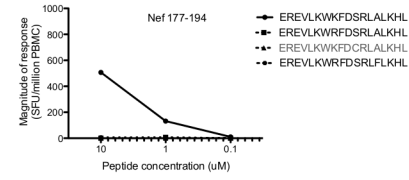**B.**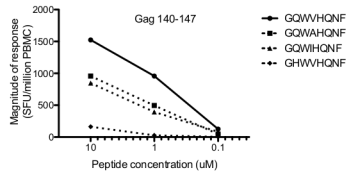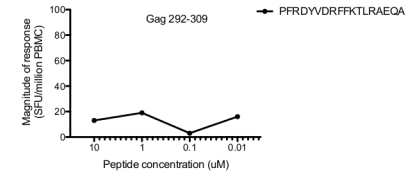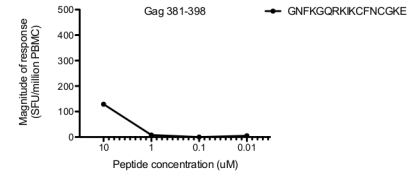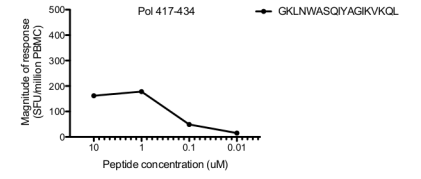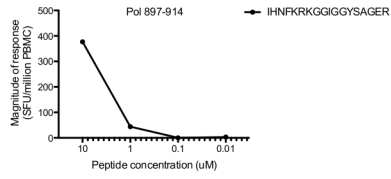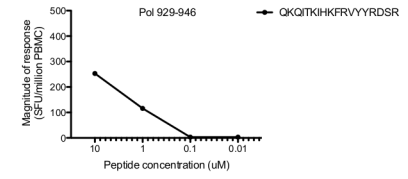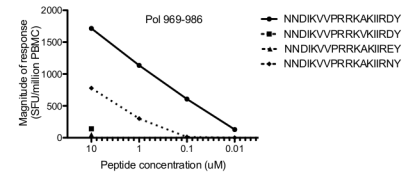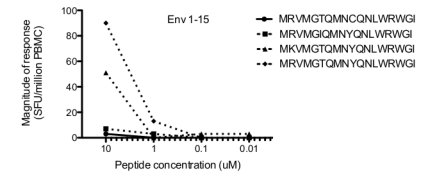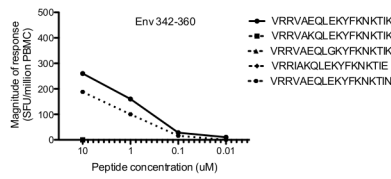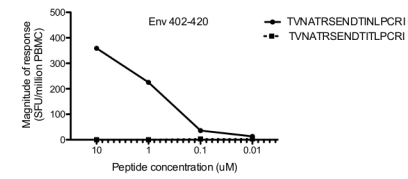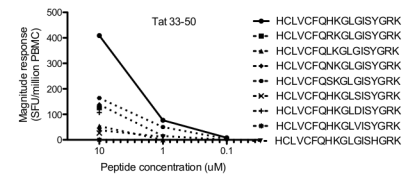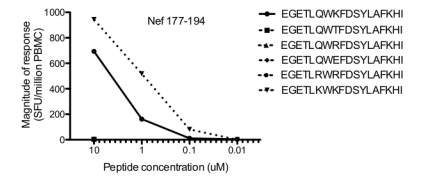

Supplement: ppat.1004565.s004.pdf [file ppat.1004565.s004.pdf]
