# Supplementary material for: Transmitted Virus Fitness and Host T Cell Responses Collectively Define Divergent Infection Outcomes in Two HIV-1 Recipients
Source: PubMed Central journal article supplement (PMC4287535; doi:10.1371/journal.ppat.1004565), 2015-01-08
Supplement: ppat.1004565.s007.pdf [file ppat.1004565.s007.pdf]

**A.**

| ENV               | 130                    | V1 | 151/284          | pre V3                  | V3 | 319/326                      | a2 helix | 355/385        | V4 | 399/451   | V5        | 468 |
|-------------------|------------------------|----|------------------|-------------------------|----|------------------------------|----------|----------------|----|-----------|-----------|-----|
| R880FCON          | CSKVNGNKTEANTEGSGREMKN |    | VKTIILVQLAQPVIIT | CIRGTGNNTRTSIRIGPGQTFYA |    | NIRKAYCNVSRTEWNDLQVVIQLGEYFK |          | CNTSTLFSSTWENG |    | TRDGGEDIN | STSETPRPG |     |
| R880F d10_CON     |                        |    |                  |                         |    |                              |          |                |    |           |           |     |
| R880F d10_A2      |                        |    |                  |                         |    |                              |          |                |    |           |           |     |
| R880F d73_B12     |                        |    |                  |                         |    |                              |          |                |    |           |           |     |
| R880F d73_A3      |                        |    |                  |                         |    |                              |          |                |    |           |           |     |
| R880F d73_B1      |                        |    |                  |                         |    |                              |          |                |    |           |           |     |
| R880F d73_B18     |                        |    |                  |                         |    |                              |          |                |    |           |           |     |
| R880F d73_A23     |                        |    |                  |                         |    |                              |          |                |    |           |           |     |
| R880F d73_B4      |                        |    |                  |                         |    |                              |          |                |    |           |           |     |
| R880F d73_A24     |                        |    |                  |                         |    |                              |          |                |    |           |           |     |
| R880F d73_B31     |                        |    |                  |                         |    |                              |          |                |    |           |           |     |
| R880F d73_A9      |                        |    |                  |                         |    |                              |          |                |    |           |           |     |
| R880F d73_A13     |                        |    |                  |                         |    |                              |          |                |    |           |           |     |
| R880F d157_B10    |                        |    |                  |                         |    |                              |          |                |    |           |           |     |
| R880F d157_B28    |                        |    |                  |                         |    |                              |          |                |    |           |           |     |
| R880F d157_A12    |                        |    |                  |                         |    |                              |          |                |    |           |           |     |
| R880F d157_A11    |                        |    |                  |                         |    |                              |          |                |    |           |           |     |
| R880F d157_B8     |                        |    |                  |                         |    |                              |          |                |    |           |           |     |
| R880F d157_B53    |                        |    |                  |                         |    |                              |          |                |    |           |           |     |
| R880F d157_A5     |                        |    |                  |                         |    |                              |          |                |    |           |           |     |
| R880F d157_B24    |                        |    |                  |                         |    |                              |          |                |    |           |           |     |
| R880F d157_B11    |                        |    |                  |                         |    |                              |          |                |    |           |           |     |
| R880F d157_B51    |                        |    |                  |                         |    |                              |          |                |    |           |           |     |
| R880F d157_B52    |                        |    |                  |                         |    |                              |          |                |    |           |           |     |
| R880F d157_B60    |                        |    |                  |                         |    |                              |          |                |    |           |           |     |
| R880F d157_B9     |                        |    |                  |                         |    |                              |          |                |    |           |           |     |
| R880F d157_A14    |                        |    |                  |                         |    |                              |          |                |    |           |           |     |
| R880F d157_A16    |                        |    |                  |                         |    |                              |          |                |    |           |           |     |
| R880F d241_3HFA23 |                        |    |                  |                         |    |                              |          |                |    |           |           |     |
| R880F d241_3HFB16 |                        |    |                  |                         |    |                              |          |                |    |           |           |     |
| R880F d241_3HFB19 |                        |    |                  |                         |    |                              |          |                |    |           |           |     |
| R880F d241_3HFB10 |                        |    |                  |                         |    |                              |          |                |    |           |           |     |
| R880F d241_3HFB30 |                        |    |                  |                         |    |                              |          |                |    |           |           |     |
| R880F d241_3HFB45 |                        |    |                  |                         |    |                              |          |                |    |           |           |     |
| R880F d241_3HFB1  |                        |    |                  |                         |    |                              |          |                |    |           |           |     |
| R880F d241_3HFB4  |                        |    |                  |                         |    |                              |          |                |    |           |           |     |
| R880F d241_3HFB61 |                        |    |                  |                         |    |                              |          |                |    |           |           |     |
| R880F d241_3HFB62 |                        |    |                  |                         |    |                              |          |                |    |           |           |     |
| R880F d241_3HFB27 |                        |    |                  |                         |    |                              |          |                |    |           |           |     |
| R880F d341_3HFC24 |                        |    |                  |                         |    |                              |          |                |    |           |           |     |
| R880F d341_3HFC1  |                        |    |                  |                         |    |                              |          |                |    |           |           |     |
| R880F d341_3HFC10 |                        |    |                  |                         |    |                              |          |                |    |           |           |     |
| R880F d341_3HFC19 |                        |    |                  |                         |    |                              |          |                |    |           |           |     |
| R880F d341_3HFC14 |                        |    |                  |                         |    |                              |          |                |    |           |           |     |
| R880F d341_3HFB39 |                        |    |                  |                         |    |                              |          |                |    |           |           |     |
| R880F d341_3HFC25 |                        |    |                  |                         |    |                              |          |                |    |           |           |     |
| R880F d341_3HFC2  |                        |    |                  |                         |    |                              |          |                |    |           |           |     |
| R880F d341_3HFA9  |                        |    |                  |                         |    |                              |          |                |    |           |           |     |
| R880F d341_3HFB13 |                        |    |                  |                         |    |                              |          |                |    |           |           |     |

**B.**

|                | V1      | V2         | 2 helix | V4                                                                                        |
|----------------|---------|------------|---------|-------------------------------------------------------------------------------------------|
| R463F d12_CON  | CKAPNIT | ADMREIEIKN | DRRRKMY | NVSKAEWNETVRRVAEQLEKYFKNKTIKFTNSSGGDLLEITHSPFCGGEFFYCNLSALFDSTWRFNNGISGNDIVNATRSENDTINLPC |
| R463F d12_1-10 |         |            |         |                                                                                           |
| R463F d19_1-10 |         |            |         |                                                                                           |
| R463F d60_1-9  |         |            |         |                                                                                           |
| R463F d60_A15  |         |            |         |                                                                                           |
| R463F d81_C26  |         |            |         |                                                                                           |
| R463F d81_D15  |         |            |         |                                                                                           |
| R463F d81_D4   |         |            |         |                                                                                           |
| R463F d81_D14  |         |            |         |                                                                                           |
| R463F d81_D6   |         |            |         |                                                                                           |
| R463F d81_D11  |         |            |         |                                                                                           |
| R463F d81_B10  |         |            |         |                                                                                           |
| R463F d81_C2   |         |            |         |                                                                                           |
| R463F d81_C18  |         |            |         |                                                                                           |
| R463F d81_D17  |         |            |         |                                                                                           |
| R463F d81_C23  |         |            |         |                                                                                           |
| R463F d81_C16  |         |            |         |                                                                                           |
| R463F d81_D16  |         |            |         |                                                                                           |
| R463F d81_D22  |         |            |         |                                                                                           |
| R463F d81_D26  |         |            |         |                                                                                           |
| R463F d81_D29  |         |            |         |                                                                                           |
| R463F d81_D31  |         |            |         |                                                                                           |
| R463F d81_D32  |         |            |         |                                                                                           |
| R463F d179_A13 |         |            |         |                                                                                           |
| R463F d179_C22 |         |            |         |                                                                                           |
| R463F d179_A9  |         |            |         |                                                                                           |
| R463F d179_B24 |         |            |         |                                                                                           |
| R463F d179_B28 |         |            |         |                                                                                           |
| R463F d179_C19 |         |            |         |                                                                                           |
| R463F d179_A21 |         |            |         |                                                                                           |
| R463F d179_B11 |         |            |         |                                                                                           |
| R463F d248_C1  |         |            |         |                                                                                           |
| R463F d248_D9  |         |            |         |                                                                                           |
| R463F d248_E20 |         |            |         |                                                                                           |
| R463F d248_E8  |         |            |         |                                                                                           |
| R463F d248_E13 |         |            |         |                                                                                           |
| R463F d248_E23 |         |            |         |                                                                                           |
| R463F d248_E22 |         |            |         |                                                                                           |
| R463F d248_E29 |         |            |         |                                                                                           |
| R463F d248_A1  |         |            |         |                                                                                           |
| R463F d248_B18 |         |            |         |                                                                                           |
| R463F d248_C10 |         |            |         |                                                                                           |
| R463F d248_C11 |         |            |         |                                                                                           |
| R463F d248_C5  |         |            |         |                                                                                           |
| R463F d248_C18 |         |            |         |                                                                                           |
| R463F d248_D10 |         |            |         |                                                                                           |
| R463F d248_D20 |         |            |         |                                                                                           |
| R463F d248_D5  |         |            |         |                                                                                           |
| R463F d333_B30 |         |            |         |                                                                                           |
| R463F d333_B3  |         |            |         |                                                                                           |
| R463F d333_A9  |         |            |         |                                                                                           |
| R463F d333_B16 |         |            |         |                                                                                           |
| R463F d333_B4  |         |            |         |                                                                                           |
| R463F d333_B2  |         |            |         |                                                                                           |
| R463F d333_B29 |         |            |         |                                                                                           |
| R463F d333_B34 |         |            |         |                                                                                           |
| R463F d333_B41 |         |            |         |                                                                                           |
| R463F d333_B60 |         |            |         |                                                                                           |
| R463F d333_B8  |         |            |         |                                                                                           |
