# Supplementary material for: Transmitted Virus Fitness and Host T Cell Responses Collectively Define Divergent Infection Outcomes in Two HIV-1 Recipients
Source: PubMed Central journal article supplement (PMC4287535; doi:10.1371/journal.ppat.1004565), 2015-01-08
Supplement: ppat.1004565.s008.pdf [file ppat.1004565.s008.pdf]

**Table S1. Longitudinal sequence analysis of virus isolated from individual R880F**

| Epitope      | Day12 <sup>a</sup>  | Day73 <sup>b</sup>                 | Day157 <sup>b</sup>                                                       | Day241 <sup>b</sup>                                      | Day323 <sup>b</sup>                                           |
|--------------|---------------------|------------------------------------|---------------------------------------------------------------------------|----------------------------------------------------------|---------------------------------------------------------------|
| Gag 17-34    | EKIRLRPGGKKYRMKHL   | ----- 100%                         | ----- 100%                                                                | ----- 100%                                               | ----- 100%                                                    |
| Gag 85-95    | LYCVHQRIEVK         | ----- 90%<br>--W----- 10%          | ----- 67%<br>-----M--- 33%                                                | ----- 100%                                               | ----- 86%<br>-----M--- 14%                                    |
| Gag 140-157  | GQMIHQPLSPRTLNAWVK  | ----- 100%                         | ----- 100%                                                                | ----- 83%<br>-----S----- 17%                             | ----- 100%                                                    |
| Pol 417-434  | GKLNWASQIYPGIKVKQL  | ----- 100%                         | ----- 33.3%<br>-----R----- 33.3%<br>-----I----- 33.3%                     | -----Q----- 66%<br>-----I----- 17%<br>--K-----QI--- 17%  | -----Q----- 72%<br>-----G-----Q----- 14%<br>-----QI----- 14%  |
| Pol 425-442  | IYPGIKVKQLCKLLRGTK  | ----- 100%                         | ----- 33.3%<br>--R----- 33.3%<br>--I----- 33.3%                           | -----Q----- 66%<br>--I----- 17%<br>--QI----- 17%         | -----Q----- 86%<br>--QI----- 14%                              |
| Pol 817-826  | LKLAGRWPVK          | ----- 100%                         | ----- 100%                                                                | ----- 100%                                               | ----- 100%                                                    |
| Pol 969-986  | NSDIKVVPRRKAKIIRDY  | ----- 90%<br>--I----- 10%          | ----- 100%                                                                | ----- 60%<br>--I----- 20%<br>--E-----V----- 20%          | ----- 100%                                                    |
| Pol 977-994  | RRKAKIIRDYDGKQMGDD  | ----- 100%                         | ----- 100%                                                                | ----- 80%<br>--V----- 20%                                | ----- 100%                                                    |
| Pol 985-1002 | DYGKQMGDDCVAGRQDE   | ----- 100%                         | ----- 100%                                                                | ----- 100%                                               | ----- 100%                                                    |
| Env 350-368  | GEYFKNKTIFFNSSGGD   | ----- 100%                         | ----- 100%                                                                | ----- 91%<br>--R----- 9%                                 | -----R----- 60%<br>----- 40%                                  |
| Env 815-823  | VDTIAIAVA           | ----- 80%<br>-----T-- 20%          | --N----- 46%<br>----- 33%<br>--N-----T-- 7%<br>--E----- 7%<br>--T----- 7% | --N----- 45%<br>----- 27%<br>-----T-- 18%<br>-----V-- 9% | N----- 73%<br>-----T-- 27%                                    |
| Rev 11-21    | ELLRAIRIKI          | ----- 100%                         | --K----- 67%<br>----- 33%                                                 | --K----- 82%<br>----- 18%                                | --K----- 100%                                                 |
| Vif 25-42    | VKHHMYVSKRAKRWFYRH  | ----- 100%                         | ----- 67%<br>--Q----- 33%                                                 | ----- 75%<br>--H----- 17%<br>-----A----- 8%              | -----R----- 64%<br>--H----- 18%<br>-----I----- 9%<br>----- 9% |
| Nef 177-194  | EREVLKWKFD SRLALKHL | -----R----- 90%<br>-----C----- 10% | -----R----- 100%                                                          | -----R----- 91%<br>-----CH-F----- 9%                     | -----R----- 56%<br>-----R-----F----- 44%                      |

<sup>a</sup> Epitope Amino acid sequence in the autologous virus at the earliest timepoint available for analysis (10 days post-Fiebig I/II)

<sup>b</sup> The proportion of viral genomes sequenced that retained the founder virus epitope sequence (indicated by dashes) or the mutant versions thereof at the indicated time-points (days post-Fiebig I/II)
