# Supplementary material for: Transmitted Virus Fitness and Host T Cell Responses Collectively Define Divergent Infection Outcomes in Two HIV-1 Recipients
Source: PubMed Central journal article supplement (PMC4287535; doi:10.1371/journal.ppat.1004565), 2015-01-08
Supplement: ppat.1004565.s009.pdf [file ppat.1004565.s009.pdf]

**Table S2 - Longitudinal sequence analysis of virus isolated from individual R463F**

| Epitope      | Day 12 <sup>a</sup>               | Day 19 <sup>b</sup>                                                                                                                 | Day 60 <sup>b</sup>                                                              | Day 179 <sup>b</sup>                                      | Day 248 <sup>b</sup>                                                             | Day 333 <sup>b</sup>                                                     |
|--------------|-----------------------------------|-------------------------------------------------------------------------------------------------------------------------------------|----------------------------------------------------------------------------------|-----------------------------------------------------------|----------------------------------------------------------------------------------|--------------------------------------------------------------------------|
| Gag 132-149  | YPVVQNAQGQWVHQNFSF                | ----- 100%                                                                                                                          | ----- 100%                                                                       | -----A----- 87.5%<br>-----I----- 12.5%                    | -----A----- 37.5%<br>-----H----- 37.5%<br>-----P----- 12.5%<br>-----H----- 12.5% | -----A----- 44%<br>-----H----- 33%<br>-----I----- 11%<br>-----T----- 11% |
| Gag 140-157  | GQWVHQNFSRPTLNAWVK                | ----- 100%                                                                                                                          | ----- 100%                                                                       | ---A----- 87.5%<br>---I----- 12.5%                        | ---A----- 37.5%<br>---H----- 37.5%<br>---P----- 12.5%<br>---H----- 12.5%         | ---A----- 44%<br>---H----- 33%<br>---I----- 11%<br>---T----- 11%         |
| Gag 292-309  | PFRDYVDRFFKTLRAEQA                | ----- 100%                                                                                                                          | ----- 100%                                                                       | ----- 100%                                                | ----- 100%                                                                       | ----- 100%                                                               |
| Gag 381-398  | GNFKGQRKIKCFNCGKE                 | ----- 100%                                                                                                                          | ----- 100%                                                                       | ----- 100%                                                | ----- 100%                                                                       | ----- 100%                                                               |
| Pol 409-426  | VNDIQKLVGKLNWASQIY                | ----- 100%                                                                                                                          | ----- 100%                                                                       | ----- 100%                                                | ----- 100%                                                                       | ----- 100%                                                               |
| Pol 417-434  | GKLNWASQIYAGIKVKQL                | ----- 100%                                                                                                                          | ----- 100%                                                                       | ----- 100%                                                | ----- 100%                                                                       | ----- 100%                                                               |
| Pol 897-914  | IHNFKRKGIGGYSAGER                 | ----- 100%                                                                                                                          | ----- 100%                                                                       | ----- 100%                                                | ----- 100%                                                                       | ----- 100%                                                               |
| Pol 929-946  | QKQITKHKFRVYYRDSR                 | ----- 100%                                                                                                                          | ----- 100%                                                                       | ----- 100%                                                | ----- 100%                                                                       | ----- 100%                                                               |
| Pol 969-986  | NNDIKVPRRKAKIIRDY                 | ----- 100%                                                                                                                          | ----- 100%                                                                       | ----- 75%<br>-----V----- 12.5%<br>-----E----- 12.5%       | ----- 87.5%<br>-----X----- 12.5%                                                 | ----- 56%<br>-----V----- 22%<br>K-----V----- 11%<br>-----N----- 11%      |
| Pol 977-994  | RRKAKIIRDYKQKQAGD                 | ----- 100%                                                                                                                          | ----- 100%                                                                       | ----- 75%<br>---V----- 12.5%<br>---E----- 12.5%           | ----- 87.5%<br>X----- 12.5%                                                      | ----- 56%<br>---V----- 33%<br>---N----- 11%                              |
| Pol 985-1002 | DYKQKQAGDDCVAGRQDE                | ----- 100%                                                                                                                          | ----- 87.5%<br>-----G----- 12.5%                                                 | ----- 87.5%<br>E----- 12.5%                               | ----- 100%                                                                       | ----- 78%<br>N----- 11%<br>-----M----- 11%                               |
| Env 1-15     | MRVMGTQMNYQNLWRWGI                | ----- 100%                                                                                                                          | ----- 100%                                                                       | ----- 63%<br>-----C----- 25%<br>-----I----- 12%           | ----- 50%<br>-K----- 25%<br>-----C----- 12.5%<br>---T----- 12.5%                 | -K----- 78%<br>-----C----- 22%                                           |
| Env 334-351  | SKAEWNETVRRVAEQLEK                | ----- 100%                                                                                                                          | ----- 100%                                                                       | ----- 67%<br>-----K----- 22%<br>-----G----- 11%           | -----N----- 75%<br>---I-K-----E----- 25%                                         | -----N----- 91%<br>-Q-----G-----N----- 9%                                |
| Env342-360   | VRRVAEQLEKYFKNKTIK                | ----- 100%                                                                                                                          | ----- 100%                                                                       | ----- 62.5%<br>-----K----- 25%<br>-----G----- 12.5%       | -----N----- 50%<br>---I-K-----E----- 37.5%<br>-----E----- 12.5%                  | -----N----- 89%<br>-Q-----G-----N----- 11%                               |
| Env 402-420  | TVNATRSENDTINLPCRI                | ----- 100%                                                                                                                          | ----- 100%                                                                       | ----- 100.0%                                              | ----- 100%                                                                       | ----- 44.5%<br>-----T----- 44.5%<br>-----S----- 11%                      |
| Tat 33-50    | HCLVCFQHKGLGISYGRK<br>-----D----- | -----R----- 36%<br>-----S----- 21%<br>-----L----- 14%<br>-----D----- 7%<br>-----V----- 7%<br>-----H----- 7%<br>-----R-----H----- 7% | -----S----- 62.5%<br>-----H----- 12.5%<br>-----L----- 12.5%<br>-----N----- 12.5% | -----N----- 37.5%<br>-----L----- 37.5%<br>-----S----- 25% | -----N----- 75%<br>-----L----- 25%                                               | -----N----- 45%<br>-----L----- 33%<br>-----S----- 22%                    |
| Nef 177-194  | EGETLQWKFDSYLAFKHI                | ----- 100%                                                                                                                          | ----- 37.5%<br>-----E----- 37.5%<br>-----T----- 12.5%<br>-----R----- 12.5%       | -----R----- 87.5%<br>-----T----- 12.5%                    | -----R----- 37.5%<br>-----R-R----- 37.5%<br>-----K----- 25%                      | -----R-R----- 100%                                                       |

<sup>a</sup> Epitope Amino acid sequence in the autologous virus at the earliest time-point available for analysis (3 days post-Fiebig I/II)

<sup>b</sup> The proportion of viral genomes sequenced that retained the founder virus epitope sequence (indicated by dashes) or the mutant versions thereof at the indicated time-points (days post-Fiebig I/II)
